1  
2  
3  
4  
5  
6  
7  
8  
9  
10  
11  
12  
13  
14  
15  
16  
17  
18  
19  
20  
21  
22  
23  
24  
25  
26  
27  
28  
29  
30  
31  
32  
33  
34  
35  
36  
37  
38  
39  
40  
41

**Measuring *C. elegans* spatial foraging and food intake using bioluminescent bacteria**

**Siyu Serena Ding<sup>\*,†</sup>, Karen S. Sarkisyan<sup>\*,†</sup>, Andre E. X. Brown<sup>\*,†</sup>**

<sup>\*</sup>Institute of Clinical Sciences, Imperial College London, London, United Kingdom

<sup>†</sup>MRC London Institute of Medical Sciences, London, United Kingdom

**Running title:** *C. elegans* feeding

**Key words:** bioluminescence, imaging, *C. elegans*, foraging, food distribution, feeding rate

**Corresponding Author:**

Andre E. X. Brown

Institute of Clinical Sciences  
Imperial College London  
Du Cane Road  
London W12 0NN  
United Kingdom

+44 (0)20 3313 8218  
andre.brown@imperial.ac.uk

42  
43  
44  
45  
46  
47  
48  
49  
50  
51  
52  
53  
54  
55  
56  
57  
58  
59  
60  
61  
62  
63  
64  
65  
66  
67  
68  
69  
70  
71  
72  
73  
74  
75  
76  
77  
78  
79  
80  
81  
82  
83  
84  
85  
86  
87  
88  
89  
90  
91

## ABSTRACT

For most animals, feeding includes two behaviours: foraging to find a food patch and food intake once a patch is found. The nematode *Caenorhabditis elegans* is a useful model for studying the genetics of both behaviours. However, most methods of measuring feeding in worms quantify either foraging behaviour or food intake but not both. Imaging the depletion of fluorescently labelled bacteria provides information on both the distribution and amount of consumption, but even after patch exhaustion a prominent background signal remains, which complicates quantification. Here, we used a bioluminescent *Escherichia coli* strain to quantify *C. elegans* feeding. With light emission tightly coupled to active metabolism, only living bacteria are capable of bioluminescence so the signal is lost upon ingestion. We quantified the loss of bioluminescence using N2 reference worms and *eat-2* mutants, and found a nearly 100-fold increase in signal-to-background ratio and lower background compared to loss of fluorescence. We also quantified feeding using aggregating *npr-1* mutant worms. We found that groups of *npr-1* mutants first clear bacteria from each other before foraging collectively for more food; similarly, during high density swarming, only worms at the migrating front are in contact with bacteria. These results demonstrate the usefulness of bioluminescent bacteria for quantifying feeding and suggest a hygiene hypothesis for the function of *C. elegans* aggregation and swarming.

## INTRODUCTION

Feeding behaviour plays an important role in fields ranging from ecology and evolution (Larsen 2003; MacArthur and Pianka 1966) to ageing and metabolism (Balasubramanian, Howell, and Anderson 2017; Trepanowski et al. 2011) and health and disease (Djalalinia et al. 2015; Mattson et al. 2014). The roundworm *C. elegans* has emerged as a useful model organism to study all aspects of feeding, including worms' immediate response to finding food (Sawin, Ranganathan, and Horvitz 2000), foraging and patch leaving (Shtonda 2006; Harvey 2009; Bendesky et al. 2011; Milward et al. 2011; E. Scott et al. 2017), as well as the details of food intake (L. Avery 1993; Leon Avery and Shtonda 2003; Fang-Yen, Avery, and Samuel 2009) and even spitting (Bhatla et al. 2015).

These studies of the genes and neural circuits underlying feeding rely on a variety of methods that have been developed to quantify feeding in *C. elegans*. *C. elegans* feeds by sucking bacteria into its mouth using rhythmic pumping of pharynx (Avery and You 2012), and pharyngeal pumping frequency is often used as a proxy for food intake. Because worms are transparent, pharyngeal pumping can be measured manually by direct observation under a stereomicroscope or more recently, using automated image analysis (Scholz et al. 2016). Electrophysiological readouts can also be used to measure multiple worms in parallel in microfluidic devices (Lockery et al. 2012). Alternatively, feeding can be measured using a non-food additive such as exogenous luciferin (Rodríguez-Palero et al. 2018), dye (You et al. 2008), or fluorescent beads (Fang-Yen et al. 2009; Kiyama et al. 2012). Bacteria consumption can also be measured directly by optical density in liquid (Gomez-Amaro et al. 2015) or by using fluorescently-labelled bacteria. Labelled bacteria can provide a quantitative measurement of food inside the worm gut using a worm sorter

92 (Andersen et al. 2014) or image analysis (You et al. 2008), and consumption can be  
93 measured on solid media using a plate reader (Zhao et al. 2018).

94  
95 How food is distributed and consumed in space has crucial implications for animal  
96 foraging strategy (Bernstein 1975; Ding, Muhle, et al. 2019; Lanan 2014; Stenberg  
97 and Persson 2005) and subsequent fitness. Therefore, of the existing methods of  
98 quantifying feeding, imaging the consumption of fluorescently-labelled bacteria is of  
99 particular interest since it can provide information on both where and how much food  
100 has been consumed. However, as fluorescent proteins form stable cooperatively  
101 folding structures, they are resistant to proteolytic cleavage (Nicholls and Hardy  
102 2013; Bokman and Ward 1981). This results in high background fluorescence signal  
103 even after bacteria are digested by *C. elegans*, complicating both the quantification  
104 and the interpretation of feeding behaviour.

105  
106 Here we use an *E. coli* strain with self-sustained bioluminescence to monitor both the  
107 rate of food intake and its spatial distribution in laboratory reference and mutant  
108 worms, worms treated with serotonin and naloxone, and in high-density worm  
109 swarms.

## 111 RESULTS

### 113 Bioluminescent bacteria improve signal to background ratio in a feeding assay

114  
115 Previous studies have used fluorescent protein-expressing strains of *E. coli* to  
116 measure worm feeding. However, when we recorded worms feeding on *E. coli* strain  
117 OP50-DsRed, we noticed a prominent background fluorescence signal, which was  
118 especially conspicuous in our experiments with DA609 (*npr-1* aggregation mutant)  
119 worms (Figure 1A, red arrow). These worms first form aggregates on food and then  
120 collectively swarm over the food patch following local food depletion (Ding,  
121 Schumacher, et al. 2019). It is possible that a fraction of DsRed molecules survives  
122 passage through the worm gut due to resistance to protease cleavage. Background  
123 signal may also result from fluorescent protein molecules that seeped into the  
124 medium from the cytoplasm of dead bacterial cells or have been expelled with liquid  
125 as a normal part of pharyngeal pumping. Alternatively, the background may be  
126 attributable to a small number of bacteria at a density that is low enough for worms  
127 to ignore, although this seems unlikely given that the background “halo” can be quite  
128 bright (Figure 1A, red arrow). These three possible sources of fluorescence  
129 background are not mutually exclusive and complicate the quantification and  
130 interpretation of feeding experiments. The background remained when we used a  
131 different fluorophore (*E. coli* OP50-GFP, Figure 1B, middle) or a different worm strain  
132 that does not aggregate (*C. elegans* N2, Figure 1B, right).

133  
134  
135 As an alternative to fluorescence-based bacterial labelling, we tested a  
136 bioluminescent *E. coli* strain (DH5 $\alpha$ -ilux) as the worm food source. We transformed  
137 *E. coli* DH5 $\alpha$  with a plasmid containing an engineered *Photobacterium luminescens*  
138 *lux* operon encoding enzymes of a bacterial bioluminescence system (Gregor et al.  
139 2018). These enzymes perform biosynthesis, oxidation and recycling of a long-chain  
140 fatty aldehyde, the key component of the light-emitting reaction along with flavin  
141 mononucleotide. We seed a defined quantity of DH5 $\alpha$ -ilux liquid culture onto

142 Nematode Growth Medium (NGM) plates, let a population of 40 worms feed, and  
143 monitor food consumption over time using an IVIS Spectrum imaging system. We  
144 show that following DA609 or N2 feeding experiments that result in total food  
145 exhaustion, the bioluminescence imaging method gives very reduced background  
146 when normalised against the starting signal (Figure 1C), in contrast to fluorescence  
147 imaging which shows noticeable background levels (Figure 1B). Feeding assays  
148 using bioluminescent bacteria shows a nearly 100-fold increase in signal-to-  
149 background ratio compared to using fluorescent bacteria (Figure 1B-C).  
150

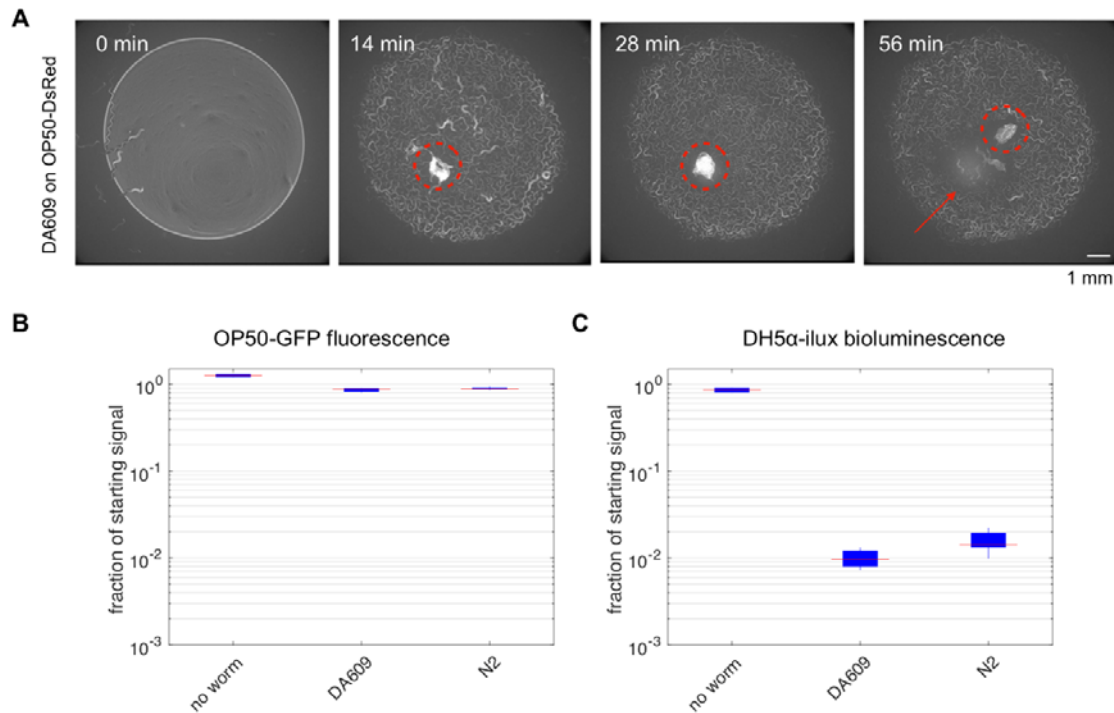

151 **Figure 1.** Assessing worm feeding behaviour with bacteria labelling. **A)** Sample snapshots of a group  
152 of 40 DA609 worms feeding on a fluorescent *E. coli* OP50-DsRed lawn. Red circles show the worm  
153 aggregate, and the red arrow points to the remaining background signal after the worm cluster moves  
154 away from its original site. **B-C)** Background signal comparison between fluorescence (B) and  
155 bioluminescence (C) methods. Population feeding experiments were performed on low peptone NGM  
156 plates seeded with fluorescent *E. coli* OP50-GFP (B) or bioluminescent *E. coli* DH5α-ilux (C). Zero  
157 (“no worm”) or 40 (“DA609” and “N2”) worms were allowed to feed on and deplete the bacteria for  
158 13.5 hours. Signal from the labelled bacteria was obtained at the start (100% food) and at the end  
159 (0% food) of the experiment using the fluorescence (465 nm excitation, 520 nm emission) or the  
160 bioluminescence (no excitation, open emission) imaging protocol, and the final to starting signal ratios  
161 were calculated. n = 2 for no-worm, n = 6 for DA609, n = 6 for N2, pooled between two independent  
162 sets of experiments.  
163  
164

165 **Bioluminescence depends on growth conditions and provides a quantitative**  
166 **measurement of worm feeding rates**  
167

168 Since bioluminescence from DH5 $\alpha$ -ilux depends on active bacterial metabolism, we  
169 next characterised signal strength under different experimental conditions. Storing  
170 bacterial culture at 4°C overnight abolishes the signal, so a fresh overnight culture  
171 was prepared for all experiments. We grew DH5 $\alpha$ -ilux in overnight liquid cultures at  
172 37°C to stationary phase and allowed them to cool down to room temperature before  
173 inoculating onto NGM media for imaging. Serial dilution of the overnight liquid culture  
174 shows roughly linear scaling with bacteria concentration (Figure 2A). After  
175 inoculating 20  $\mu$ L of overnight culture onto NGM media plates containing different  
176 levels of peptone (regular peptone, 0.25% w/v; low peptone, 0.013% w/v; no  
177 peptone, 0% w/v), bioluminescence signal was monitored for hours (Figure 2B) and  
178 days (Figure 2C) at 20°C. As expected, signal is the highest on media with the  
179 highest peptone concentration (Figure 2B-C, blue lines) and lowest on no-peptone  
180 media (Figure 2B-C, black lines). On standard NGM (0.25% peptone),  
181 bioluminescence increases for approximately one week and then decreases over  
182 several days with no obvious stationary plateau (Figure 2C, blue line); On the scale  
183 of hours, there is an initial decrease in intensity over the first few hours followed by  
184 an approximately 5-fold increase over the next day (Figure 2B, blue line). This initial  
185 decrease perhaps represents a lag phase of growth on solid media. Therefore,  
186 bioluminescence signal strength from DH5 $\alpha$ -ilux depends on a number of growth  
187 conditions that affect bacterial metabolism, including temperature, peptone level, and  
188 inoculation time.  
189

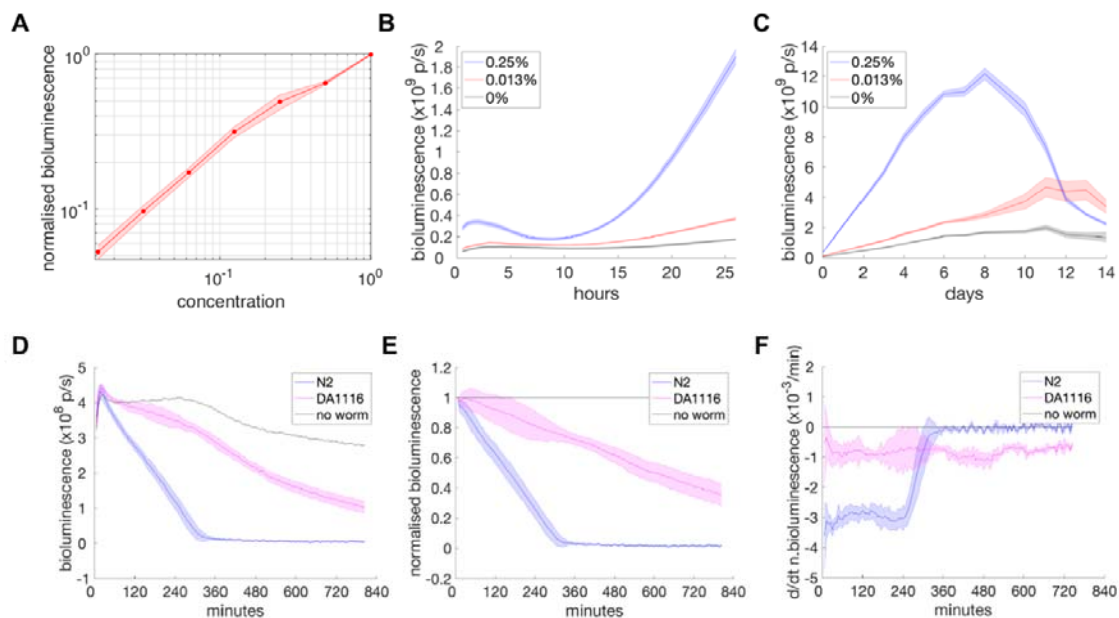

190 **Figure 2.** DH5 $\alpha$ -ilux bioluminescence signal characterisation. **A)** Normalised signal from liquid  
191 bacteria culture in a 2-fold dilution series. Concentration of 1 is undiluted bacteria overnight culture.  
192 Signal is taken immediately following serial dilution in LB broth where all samples have a final volume  
193 of 150  $\mu$ L, and are normalised to undiluted levels. Here n = 6, pooled between two independent sets  
194 of experiments. Error bars represent  $\pm 1$  standard deviation (SD). **B-C)** Signal from 20  $\mu$ L of bacteria  
195 culture after hours (B) and days (C) of inoculation on NGM media containing different peptone levels.  
196 "p/s" is photons/s. All inoculations were performed at 20 °C, and all measurements were made  
197 following a 1 second exposure. For B), signal was taken every 30 minutes and all samples were  
198

199 imaged simultaneously.  $n = 3$  for each condition, error bars represent  $\pm 1$  SD. For C), signal was taken  
200 once on most days,  $n = 3$ , error bars represent  $\pm 1$  SD. **D-F**) Bioluminescence from population feeding  
201 experiments of N2 and DA1116 worms, showing **D**) raw signal, **E**) normalised signal (normalised  
202 against the starting signal and then against the control signal), **F**) derivative of the normalised signal  
203 calculated over a 60-minute window). Forty N2 (blue) worms, forty DA1116 (magenta) worms, or no-  
204 worm control (black) experiments were performed on a 20  $\mu$ L DH5 $\alpha$ -ilux lawn. Measurements were  
205 taken every 6 minutes using 1 second exposure. All samples shown were imaged simultaneously.  
206 Here  $n = 6$  for N2,  $n = 4$  for DA1116,  $n = 2$  for control, pooled from two independent sets of  
207 experiments; error bars represent  $\pm 1$  SD.

208

209 We next compared the population feeding rates of the laboratory reference N2 strain  
210 and DA1116, an *eat-2* mutant with abnormal neurotransmission in the pharynx  
211 (McKay et al. 2004) and that pumps slowly (Raizen, Lee, and Avery 1995). To take  
212 into account different initial bioluminescence levels across experimental samples  
213 (Figure 2D), we divide the signal in each condition by the level detected in the first  
214 frame. This relative signal is then further normalised by the value of the  
215 corresponding no-worm control at each time point to correct for the non-stationarity  
216 of the signal in the absence of feeding (Figure 2E). Relative feeding rates are then  
217 estimated by taking the derivative of the normalised signals over time (Figure 2F).  
218 Since the normalisation is important for reliably estimating the feeding rate, we  
219 recommend including no-worm controls whenever possible.

220

221 We show that both N2 and DA1116 worm strains deplete the food at a roughly  
222 constant rate (Figure 2E-F) and that the median feeding rate from the first four hours  
223 (before N2 runs out of food) for DA1116 is 27% that of N2. DA1116's reduced  
224 feeding rate on solid media is consistent with previous reports of its slow pumping  
225 (~10% that of N2 (Raizen, Lee, and Avery 1995)) and restricted food intake in liquid-  
226 based assays (~80% that of N2 as measured by optical density-based bacterial  
227 clearing (Gomez-Amaro et al. 2015) and ~60% that of N2 as measured by luciferin  
228 ingestion (Rodríguez-Palero et al. 2018)). This experiment also confirms that the  
229 signal from freshly inoculated overnight liquid culture is sufficient to estimate relative  
230 feeding rates. For less sensitive imaging instruments, it would be possible to  
231 incubate seeded plates for longer to obtain higher signal (Figure 2C).

232

233 We repeated the feeding experiments and analysis using OP50-GFP bacteria  
234 (Supplementary Figure S1) instead of DH5 $\alpha$ -ilux, and obtained similar results  
235 showing that DA1116 feeding rate is 27% that of N2 despite a very different no-worm  
236 control signal (Supplementary Figure S1A, black line). This highlights the importance  
237 of normalisation using either bacteria labelling method. While the relative feeding  
238 rate results are reassuringly similar between bioluminescence- and fluorescence-  
239 based methods, the fluorescence method shows a lower signal-to-background ratio  
240 as well as high background levels (Supplementary Figure S1A) that may complicate  
241 analysis and interpretation when normalised (Supplementary Figure S1B-C).

242

243 Serotonin has previously been reported to enhance pharyngeal pumping and food  
244 intake (Horvitz et al. 1982; Niacaris and Avery 2003) as well as the slowing response  
245 of starved worms (Sawin, Ranganathan, and Horvitz 2000). We thus pre-starved N2  
246 worms before exposing them to serotonin in the presence of food. Unexpectedly,  
247 serotonin-treatment caused a decrease in the measured feeding rate  
248 (Supplementary Figure S2A, blue and black lines). We observed a comparable  
249 reduction in feeding rate using OP50-GFP bacteria as the food source

250 (Supplementary Figure S2B, blue and black lines). We confirmed serotonin was  
251 having the expected effects on pumping rate (Supplementary Figure S2D). However,  
252 in serotonin-treated samples, a smaller number of worms reaches the bacterial lawn  
253 (Supplementary Figure S2E-F), most likely due to serotonin's suppression of  
254 locomotion (Horvitz et al. 1982). Therefore, these results do not contradict previous  
255 findings but highlight the multifaceted effects of serotonin and the essential role of  
256 foraging in successful feeding.

257  
258 In contrast to serotonin, the morphine antagonist naloxone has been reported to  
259 decrease food intake in starved worms by acting on an opioid receptor expressed in  
260 a sensory neuron (Cheong et al. 2015). Naloxone treatment did result in a decreased  
261 feeding rate as expected (Supplementary Figure S2A, red and black lines), but the  
262 levels of bioluminescence were much lower than in naloxone-free controls  
263 (Supplementary Figure S2C, left). We again confirmed that the feeding rate was  
264 reduced using OP50-GFP bacteria (Supplementary Figure S2B, red and black lines).  
265 Fluorescence levels were decreased compared to controls (Supplementary Figure  
266 S2C, right) but the effect was not drastic and naloxone does not detectably affect *E.*  
267 *coli* growth (Maier et al. 2018), suggesting that naloxone may act more specifically  
268 on bioluminescence-related metabolism.

269

## 270 **Bioluminescent bacteria reveal the spatial aspect of *C. elegans* feeding** 271 **behaviour**

272

273 To gain insights into different *C. elegans* feeding strategies, we performed  
274 experiments with the laboratory reference strain N2 and DA609, an *npr-1* loss-of-  
275 function mutant. The former are solitary feeders whereas the latter are social, initially  
276 forming worm aggregates on food and then collectively swarming over the food  
277 patch following local food depletion (Ding, Schumacher, et al. 2019). Our feeding  
278 experiments on DH5 $\alpha$ -ilux bioluminescent bacteria show that DA609 and N2  
279 populations both have stable feeding rates, and that DA609 has a feeding rate that is  
280 58% that of N2 (Figure 3A-B). Experiments with OP50-GFP fluorescent bacteria also  
281 show a relative feeding rate of 58% (Supplementary Figure S3). Thus the social  
282 feeders have a lower feeding rate than the solitary ones despite similar pharyngeal  
283 pumping rates (Choi et al. 2013), consistent with a previous report measuring the  
284 amount of fluorescently labelled bacteria inside worm guts (Andersen et al. 2014).

285

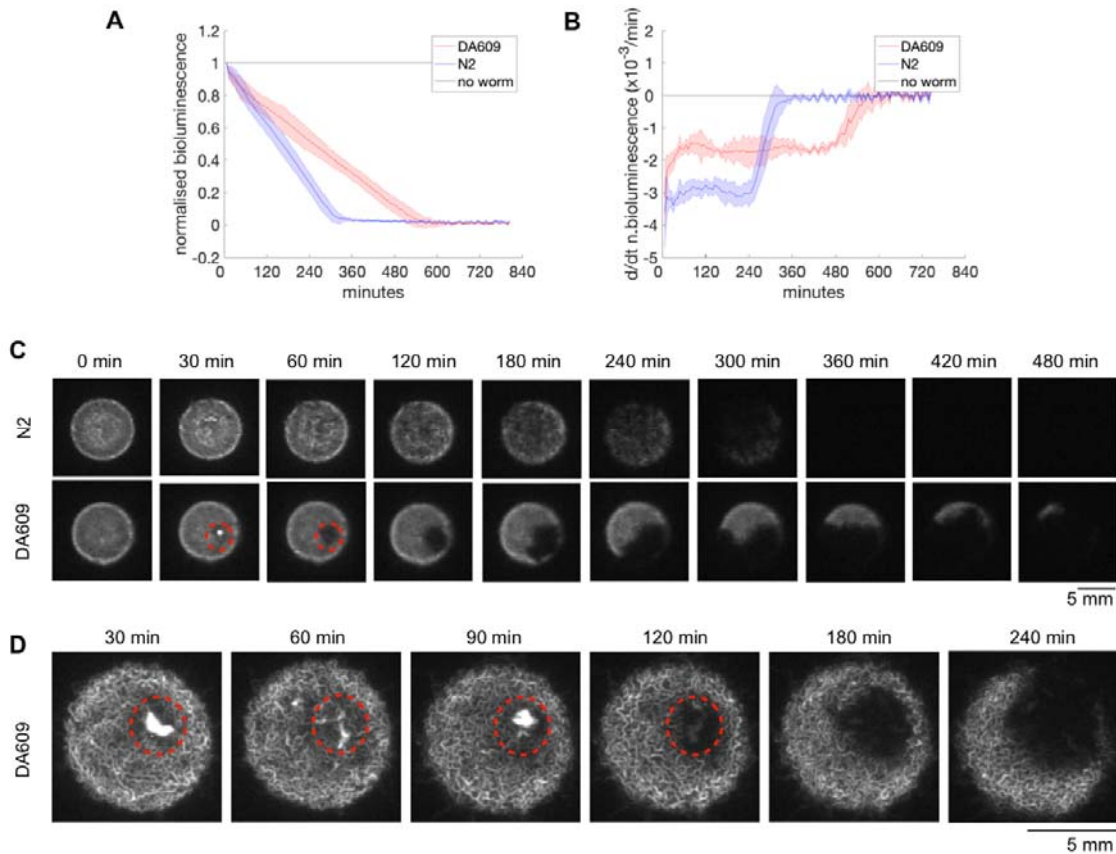

286  
287 **Figure 3.** Bioluminescence from population feeding experiments of N2 and DA609 worms, showing  
288 **A)** normalised signal, and **B)** derivative of the normalised signal calculated over a 60-minute window.  
289 Forty DA609 (red) or N2 (blue) worms or no-worm control (black) experiments were performed on a  
290 20  $\mu$ L DH5 $\alpha$ -ilux lawn. One second exposure measurements were read every 6 minutes.  $n = 6$  for  
291 each condition, pooled between two independent sets of experiments; error bars represent  $\pm 1$  SD. **C)**  
292 A series of snapshots contrasting the spatial pattern of food depletion in N2 (top) and DA609 (bottom)  
293 population feeding experiments. **D)** A series of snapshots showing a DA609 worm aggregate (red  
294 circles) depleting food within the cluster first before moving onto new food.

295

296 Bioluminescence imaging also provides spatial information and we examined the  
297 pattern of food depletion between the two feeding strategies and noted major  
298 differences. While N2 worms show gradual depletion of the whole food patch roughly  
299 uniformly (Figure 3C, top row; Supplementary Movie S1, middle row), DA609 worms  
300 deplete food in a highly localised manner starting at one point and sweeping over the  
301 surface (Figure 3C, bottom row; Supplementary Movie S1, top row). These foraging  
302 behaviours observed here by bacterial depletion are consistent with our previous  
303 results in which worms were imaged directly (Ding, Schumacher, et al. 2019).

304

305 Moreover, we noticed that when DA609 worms initially aggregate they are covered in  
306 bacteria (Figure 3C-D, 30 min panels) and that the cluster stays in roughly the same  
307 place (Figure 3C-D, red circles) until the in-cluster bacteria are completely  
308 consumed. This observation fits well with the distinct “aggregation” versus  
309 “swarming” phases that we previously reported for DA609 (*npr-1*) aggregation (Ding,  
310 Schumacher, et al. 2019), suggesting that minimal cluster movement during the  
311 “aggregation” phase is due to the initial food availability inside the cluster. By  
312 contrast, the total depletion of bacteria inside the aggregate before collective



313 movement starts is difficult to detect from the recordings of worms feeding on  
314 fluorescent bacteria, because the moving worm cluster is still fluorescent (Figure 1A,  
315 last panel; note the aggregation timescale is different for this experiment because  
316 OP50-DsRed bacteria were diluted). As mentioned previously, the source of this  
317 signal is unknown, but the bioluminescence results suggest that it is not due to  
318 residual metabolically active bacteria that adhere to the worm surface.

319

### 320 **Large-scale *C. elegans* swarms form a stable moving front on food**

321

322 To study the behaviour of larger populations of swarming worms, we imaged  
323 thousands of young adult N2 worms feeding on larger 500  $\mu$ L patches of DH5 $\alpha$ -ilux  
324 bacteria and observed coherent swarming as the migrating worm front consumes the  
325 bacterial lawn in a single pass (Figure 4A; Supplementary Movie S2). Similar results  
326 were seen using OP50-GFP, although the fluorescent background remains after the  
327 front has passed (Supplementary Figure S4A; Supplementary Movie S3). Bacterial  
328 signal during swarming can be quantified using the same analysis methods as in 40-  
329 worm feeding experiments (Figure 4B-C).

330

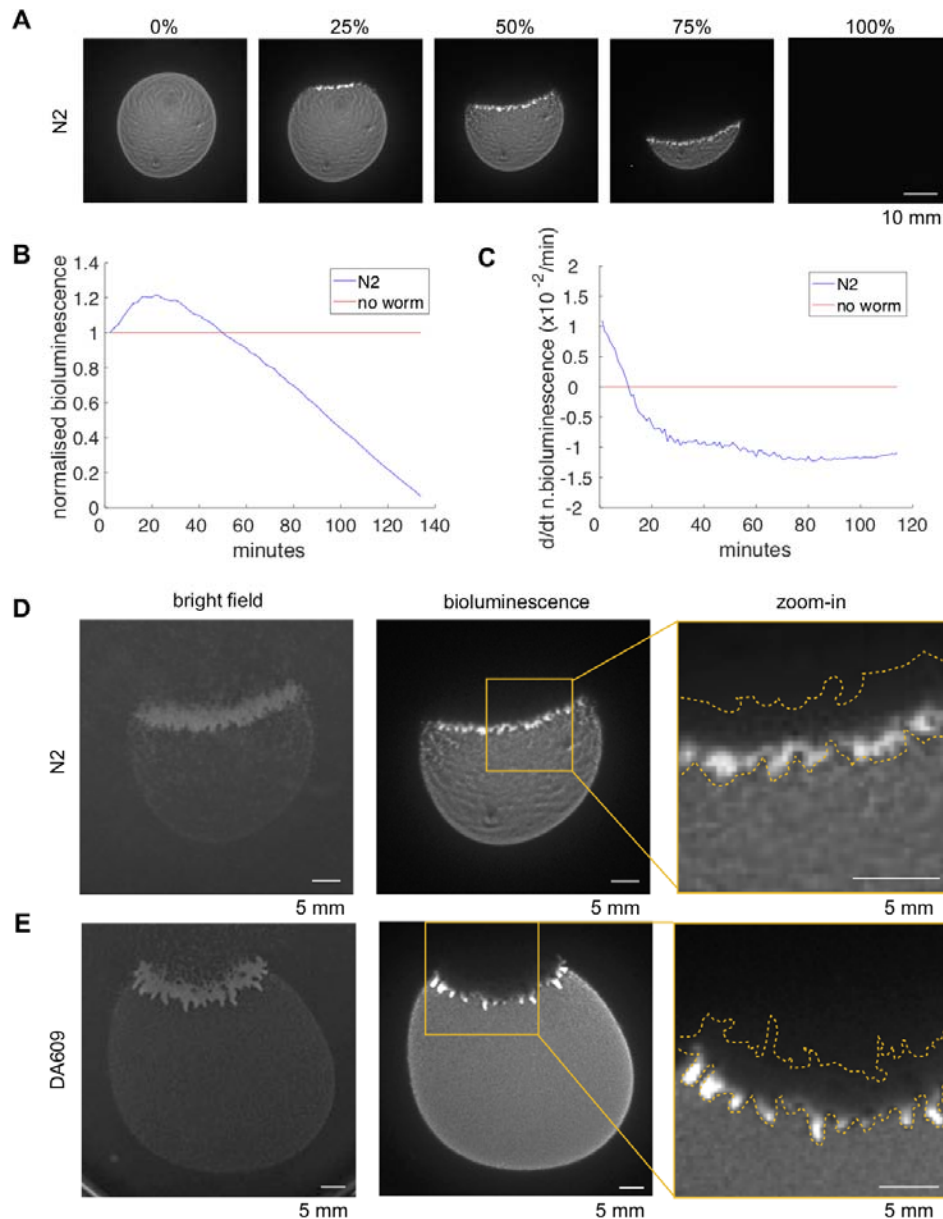

331  
332 **Figure 4.** Bioluminescence signal from large population swarming experiments. A few thousand age-  
333 synchronised worms were allowed to feed and swarm over a 500  $\mu\text{L}$  DH5 $\alpha$ -ilux lawn. **A)** Snapshots of  
334 N2 swarming experiments, with time progression to total food depletion indicated at the top. **B)**  
335 Normalised signal and **C)** derivative of the normalised signal calculated over a 20-minute window,  
336 from an N2 swarming experiment with 1 day-old DH5 $\alpha$ -ilux lawn. **D-E)** Sample snapshots from N2 (D)  
337 and DA609 (E) swarming experiments, showing bright field (left) and bioluminescence (middle)  
338 channels. The boxes in the middle panels are zoomed in and displayed on the right, with the worm  
339 front outline shown in dashed yellow lines.

340

341 Large populations of DA609 worms also swarm (Figure 4E). By overlaying the  
342 bioluminescence channel (Figure 4D-E, middle) with the bright field images (Figure  
343 4D-E, left), it is clear that only worms at the leading edge of the migrating front are in  
344 contact with bacteria regardless of the worm strain (Figure 4D-E, right). We  
345 confirmed these results using OP50-GFP bacteria (Supplementary Figure S4),  
346 although the bacterial gradient is less obvious due to background fluorescence. Our  
347 results are similar to those in a recent study reporting a bacterial gradient in

348 swarming *C. elegans* using OP50-GFP (Demir, Yaman, and Kocabas 2019). Finally,  
349 DA609 swarms form pronounced finger-like projections at the leading edge of the  
350 migrating front that protrude into the bacterial lawn (Figure 4E; Supplementary Movie  
351 S4; Supplementary Figure S4E).

352

353

354

355

## DISCUSSION

356 We have developed *C. elegans* feeding assays using bioluminescently labelled  
357 bacteria. This method allows simultaneous quantification of food intake and  
358 visualisation of food distribution, which are both important aspects of *C. elegans*  
359 feeding behaviour even though food intake has previously received greater attention.  
360 We show that a bioluminescence-based method results in higher signal-to-  
361 background ratios that simplify analysis and interpretation compared to fluorescence-  
362 based methods. In addition, it circumvents issues associated with fluorescence  
363 imaging such as phototoxicity, bleaching, autofluorescence, and behavioural  
364 modulation. Compared with other imaging-based methods, our method directly  
365 measures the ingestion of bacteria, rather than estimating bacterial uptake using  
366 exogenous dye (You et al. 2008), beads (Fang-Yen, Avery, and Samuel 2009), or  
367 luciferin (Rodríguez-Palero et al. 2018) as a proxy. The ingestion of these artificial  
368 molecules can occur in the absence of bacterial food (Kiyama, Miyahara, and  
369 Ohshima 2012; Rodríguez-Palero et al. 2018), which may be seen as a  
370 disadvantage or an advantage depending on the application. For example, if the  
371 research question requires measuring intake without the complication of bacterial  
372 multiplication and metabolism, then a proxy may be preferred.

373

374 The reduction in bioluminescence that results from naloxone treatment illustrates  
375 both a limitation and a possible advantage of using a signal that requires active  
376 bacterial metabolism. On the one hand, if the signal is completely abolished then  
377 measurement is impossible. On the other hand, knowing that a given treatment  
378 affects bacterial physiology may be useful information in interpreting any observed  
379 feeding differences, since drug effects on bacteria are known to also affect host  
380 physiology (Cabreiro et al. 2013; Scott et al. 2017; García-González et al. 2017).  
381 Another limitation of our method is its sensitivity: we were unable to detect single  
382 worm feeding, although this is likely to be possible using a higher magnification  
383 imaging system.

384

385 Wild *C. elegans* strains aggregate and feed in groups when grown in the lab much  
386 like the *npr-1* mutants studied here, while the N2 laboratory reference strain are  
387 solitary feeders (de Bono and Bargmann 1998). The most commonly cited  
388 hypothesis to explain why wild isolates aggregate is that aggregation is useful to  
389 avoid high oxygen environments that represent oxidative stress, UV damage and  
390 desiccation risks (Busch and Olofsson 2012; Rogers et al. 2006). Based on our  
391 observations that DA609 worms clear bacteria inside clusters before moving onto  
392 new regions of the lawn (Figure 3C-D), and that in larger swarms only the leading  
393 edge is in contact with bacteria (Figure 4E-F), we hypothesise that collective feeding  
394 may in fact be a kind of hygienic behaviour in *C. elegans* that could reduce the risk of  
395 infections occurring through cuticle attachment.

396

397

398  
399  
400  
401

## MATERIALS AND METHODS

### Reagent Table

| Resource                     | Designation                          | Source or reference                     | Identifiers             | Additional Information             |
|------------------------------|--------------------------------------|-----------------------------------------|-------------------------|------------------------------------|
| Strain ( <i>C. elegans</i> ) | N2                                   | <i>Caenorhabditis</i> Genetics Centre   | RRID:WB-STRAIN:N2       | Laboratory reference strain        |
| Strain ( <i>C. elegans</i> ) | DA1116                               | <i>Caenorhabditis</i> Genetics Centre   | RRID:WB-STRAIN:DA1116   | Genotype: <i>eat-2(ad1116)II</i> . |
| Strain ( <i>C. elegans</i> ) | DA609                                | <i>Caenorhabditis</i> Genetics Centre   | RRID:WB-STRAIN:DA609    | Genotype: <i>npr-1(ad609)X</i> .   |
| Strain ( <i>E. coli</i> )    | DH5 $\alpha$ -ilux                   | Addgene                                 | RRID:Addgene_107879     | ilux pGEX(-)                       |
| Strain ( <i>E. coli</i> )    | OP50-GFP                             | Jonathan Hodgkin (University of Oxford) | RRID:WB-STRAIN:OP50-GFP |                                    |
| Strain ( <i>E. coli</i> )    | OP50-DsRed                           | Jonathan Hodgkin (University of Oxford) |                         |                                    |
| Equipment                    | IVIS Spectrum In Vivo Imaging System | PerkinElmer                             | 124262                  |                                    |
| Software, Algorithm          | Living Image software                | PerkinElmer                             | RRID:SCR_014247         | Version 4.3.1                      |
| Chemical compound, drug      | serotonin                            | Sigma-Aldrich                           | H7752                   |                                    |
| Chemical compound, drug      | naloxone                             | Sigma-Aldrich                           | PHR1802                 |                                    |

402  
403  
404  
405  
406  
407  
408  
409  
410  
411  
412  
413  
414  
415

### ***C. elegans* maintenance and synchronisation**

*C. elegans* strains used in this study are listed in the Reagents Table above. All worms were grown on *E. coli* OP50 at 20°C as mixed stage cultures under uncrowded and unstarved conditions, and maintained as described (Brenner 1974). Synchronised young adult animals were used for all imaging experiments, and they were obtained by bleach-synchronisation and subsequent re-feeding of starved L1's on OP50 for 65-72 hours at 20°C.

### **Measure 40 worm feeding with bioluminescent or fluorescent bacteria**

A step-by-step protocol can be found at: [dx.doi.org/10.17504/protocols.io.5hsg36e](https://dx.doi.org/10.17504/protocols.io.5hsg36e).

416 For every set of experiments, a fresh overnight liquid culture of DH5 $\alpha$ -ilux or OP50-  
417 GFP was grown by inoculating a single bacterial colony into 100 mL of LB broth  
418 containing 50  $\mu$ g/mL ampicillin and incubating overnight at 37°C at 220 rpm. The  
419 liquid culture was allowed to cool down to room temperature for 3-6 hours before  
420 use. 20  $\mu$ L of the liquid culture was seeded onto the centre of a 35 mm low peptone  
421 (0.013% w/v) NGM plate and dried in a laminar flow hood (Heraguard) for 0.5 hour.  
422 Synchronised young adult worms were harvested and washed in M9 buffer, and 40  
423 animals were transferred onto the seeded plate using a glass pipette without  
424 disturbing the bacterial lawn. After M9 was absorbed into the media, the imaging  
425 plate was gently vortexed for 10 seconds on the lowest setting of a vortex mixer  
426 (Vortex-Genie 2, Scientific Industries) to randomise initial worm positions. Imaging  
427 acquisition commenced 1 minute after the vortex start using the IVIS Spectrum  
428 imaging system (Caliper LifeSciences) and Living Image software (v 4.3.1). For  
429 bioluminescence, 1 second exposures were used with blocked excitation and open  
430 emission filters; for fluorescence, 0.5 second exposures were used with 465 nm  
431 excitation and 520 nm emission filters. Images were acquired every 6 minutes for up  
432 to 13.5 hours at 20°C and raw signals from user-defined regions of interest were  
433 extracted using Living Image software for downstream analysis. Field-of-view option  
434 C (13.5 cm x 13.5 cm) was used to allow simultaneous imaging of up to nine 35 mm  
435 plate feeding samples in 3x3 configuration, where at least one sample is a no-worm  
436 control to enable subsequent signal normalisation.

437

#### 438 **Measure feeding during large population swarming with bioluminescent or** 439 **fluorescent bacteria**

440

441 A step-by-step protocol can be found at: [dx.doi.org/10.17504/protocols.io.53kg8kw](https://doi.org/10.17504/protocols.io.53kg8kw).

442

443 The bacteria overnight liquid culture was grown as described above. 500  $\mu$ L of the  
444 liquid culture was seeded onto the centre of a 90 mm low peptone (0.013% w/v)  
445 NGM plate and dried in a laminar flow hood (Heraguard) for 2.5 hours. A separate 20  
446  $\mu$ L liquid culture was seeded onto the centre of a 35 mm low peptone plate and dried  
447 in a laminar flow hood (Heraguard) for 0.5 hours to serve as a no-worm control.  
448 Synchronised young adult worms were harvested and washed in M9 buffer, and a  
449 few thousand animals were transferred onto the seeded 90 mm plate using a glass  
450 pipette without disturbing the bacterial lawn. Imaging acquisition commenced  
451 immediately after worm transfer using the IVIS Spectrum imaging system (Caliper  
452 LifeSciences) and Living Image software (v 4.3.1). For bioluminescence, 1 second  
453 exposures were used with blocked excitation and open emission filters; for  
454 fluorescence, 1 second exposures were used with 465 nm excitation and 520 nm  
455 emission filters. Images were acquired every 2 minutes for up to 4.5 hours at 20°C,  
456 and raw signals from user-defined regions of interest were extracted using Living  
457 Image software for downstream analysis. Field-of-view option C (13.5 cm x 13.5 cm)  
458 was used to allow simultaneous imaging of one 90 mm plate swarming sample and  
459 one 35 mm plate no-worm control, the latter of which was used for subsequent signal  
460 normalisation.

461

#### 462 **Measure 40 worm feeding after drug treatments**

463

464 A step-by-step protocol can be found at: [dx.doi.org/10.17504/protocols.io.53ng8me](https://doi.org/10.17504/protocols.io.53ng8me).

465

466 The protocol is essentially the same as the 40 worm feeding measurement protocol  
467 above, except for two differences: 1) Imaging plates are now low peptone NGM  
468 plates also containing drugs (20 mM serotonin or 10 mM naloxone), and 2) Young  
469 adult N2 worms were pre-starved on an unseeded NGM plate for 1 hour before  
470 being transferred onto seeded drug plates, and imaging commenced following a 1-  
471 hour drug exposure instead of immediately following worm transfer.

472  
473 Drug plates were freshly prepared the day before each experiment. For serotonin  
474 (H7752, Sigma-Aldrich) treatment, low peptone NGM agar was prepared and  
475 serotonin was added to molten agar to a final concentration of 20 mM before the  
476 agar was dispensed into 35 mm plates. For naloxone (PHR1802, Sigma-Aldrich), a  
477 10x stock solution was freshly prepared in water and 300  $\mu$ L was spread on top of a  
478 35 mm plate containing 3 mL low peptone NGM agar to achieve a final concentration  
479 of 10 mM. The naloxone plates were dried in a laminar flow hood (Heraguard) for 3  
480 hours before all drug plates were wrapped in foil and stored at 4°C overnight for  
481 immediate use the next day.

482  
483 To track worm positions following drug treatments, bright field imaging was  
484 performed using a custom-built six-camera rig equipped with Dalsa Genie cameras  
485 (G2-GM10-T2041) rather than the IVIS Spectrum imaging system. One-hour  
486 recordings were performed with 630 nm LED illumination (CCS Inc) at 25 Hz using  
487 Gecko software (v2.0.3.1), and worm positions were extracted from the pixel data  
488 using a MATLAB script.

489

#### 490 **Measure pharyngeal pumping after drug treatments**

491

492 Drug plates were prepared as described above, and were used either unseeded or  
493 seeded with 20  $\mu$ L of DH5 $\alpha$ -ilux overnight liquid culture. Pre-starved N2 young adult  
494 worms were transferred to drug plates with or without food as described above, and  
495 were exposed to the drugs for 1 hour before pharyngeal pumping was assessed.  
496 The number of pumps was scored over 60 seconds under a stereomicroscope (Zeiss  
497 Stemi 508).

498

#### 499 **Data Analysis**

500

501 Bioluminescence or fluorescence raw signals (photons/s) from imaging data were  
502 extracted from user-defined regions of interest using Living Image software (v 4.3.1).  
503 For each feeding experiment, the signal time series was divided by the level  
504 detected in the first frame. This relative signal was further normalised by the value of  
505 the corresponding no-worm control at each time point to correct for the non-  
506 stationarity of the signal in the absence of feeding. Relative feeding rates were then  
507 estimated by taking the derivative of the normalised signals over time.

508

#### 509 **Data Availability**

510

511 Supplementary Material is available on figshare. Strains and plasmids are available  
512 upon request. The authors affirm that all data necessary for confirming the  
513 conclusions of the article are present within the article and figures.

514

515

516  
517  
518  
519  
520  
521  
522  
523  
524  
525  
526  
527  
528  
529  
530  
531  
532  
533  
534  
535  
536  
537  
538  
539  
540  
541  
542  
543  
544  
545  
546  
547  
548  
549  
550  
551  
552  
553  
554  
555  
556  
557  
558  
559  
560  
561  
562  
563  
564

## REFERENCES

- Andersen, Erik C., Joshua S. Bloom, Justin P. Gerke, and Leonid Kruglyak. 2014. "A Variant in the Neuropeptide Receptor Npr-1 Is a Major Determinant of *Caenorhabditis Elegans* Growth and Physiology." *PLoS Genetics* 10 (2): e1004156. <https://doi.org/10.1371/journal.pgen.1004156>.
- Avery, L. 1993. "The Genetics of Feeding in *Caenorhabditis Elegans*." *Genetics* 133 (4): 897–917.
- Avery, Leon, and Boris B. Shtonda. 2003. "Food Transport in the *C. Elegans* Pharynx." *The Journal of Experimental Biology* 206 (Pt 14): 2441–57. <https://doi.org/10.1242/jeb.00433>.
- Avery, Leon, and Young-Jai You. 2012. "C. *Elegans* Feeding." *WormBook: The Online Review of C. Elegans Biology*, 1–23. <https://doi.org/10.1895/wormbook.1.150.1>.
- Balasubramanian, Priya, Porsha R. Howell, and Rozalyn M. Anderson. 2017. "Aging and Caloric Restriction Research: A Biological Perspective With Translational Potential." *EBioMedicine* 21 (June): 37–44. <https://doi.org/10.1016/j.ebiom.2017.06.015>.
- Bendesky, Andres, Makoto Tsunozaki, Matthew V. Rockman, Leonid Kruglyak, and Cornelia I. Bargmann. 2011. "Catecholamine Receptor Polymorphisms Affect Decision-Making in *C. Elegans*." *Nature* 472 (7343): 313–18. <https://doi.org/10.1038/nature09821>.
- Bernstein, Ruth A. 1975. "Foraging Strategies of Ants in Response to Variable Food Density." *Ecology* 56 (1): 213–19. <https://doi.org/10.2307/1935314>.
- Bhatla, Nikhil, Rita Droste, Steven R. Sando, Anne Huang, and H. Robert Horvitz. 2015. "Distinct Neural Circuits Control Rhythm Inhibition and Spitting by the Myogenic Pharynx of *C. Elegans*." *Current Biology* 25 (16): 2075–89. <https://doi.org/10.1016/j.cub.2015.06.052>.
- Bokman, Stephen H., and William W. Ward. 1981. "Renaturation of Aequorea Green-Fluorescent Protein." *Biochemical and Biophysical Research Communications* 101 (4): 1372–80. [https://doi.org/10.1016/0006-291X\(81\)91599-0](https://doi.org/10.1016/0006-291X(81)91599-0).
- Bono, M de, and C I Bargmann. 1998. "Natural Variation in a Neuropeptide Y Receptor Homolog Modifies Social Behavior and Food Response in *C. Elegans*." *Cell* 94 (5): 679–89.
- Brenner, S. 1974. "The Genetics of *Caenorhabditis Elegans*." *Genetics* 77 (1): 71–94.
- Busch, Karl Emanuel, and Birgitta Olofsson. 2012. "Should I Stay or Should I Go?" *Worm* 1 (3): 182–86. <https://doi.org/10.4161/worm.20464>.
- Cabreiro, Filipe, Catherine Au, Kit-Yi Leung, Nuria Vergara-Irigaray, Helena M. Cochemé, Tahereh Noori, David Weinkove, Eugene Schuster, Nicholas D.E. Greene, and David Gems. 2013. "Metformin Retards Aging in *C. Elegans* by Altering Microbial Folate and Methionine Metabolism." *Cell* 153 (1): 228–39. <https://doi.org/10.1016/j.cell.2013.02.035>.
- Cheong, Mi Cheong, Alexander B Artyukhin, Young-Jai You, and Leon Avery. 2015. "An Opioid-like System Regulating Feeding Behavior in *C. Elegans*." Edited by Oliver Hobert. *ELife* 4 (April): e06683. <https://doi.org/10.7554/eLife.06683>.
- Choi, Seungwon, Marios Chatzigeorgiou, Kelsey P. Taylor, William R. Schafer, and Joshua M. Kaplan. 2013. "Analysis of NPR-1 Reveals a Circuit Mechanism for

- 565 Behavioral Quiescence in *C. Elegans*.” *Neuron* 78 (5): 869–80.  
566 <https://doi.org/10.1016/j.neuron.2013.04.002>.
- 567 Demir, Esin, Y. Ilker Yaman, and Askin Kocabas. 2019. “Dynamics of Pattern  
568 Formation and Emergence of Swarming in *C. Elegans*.” *ArXiv:1906.10067*  
569 [*Physics*], June. <http://arxiv.org/abs/1906.10067>.
- 570 Ding, Siyu Serena, Leah S. Muhle, Andre E. X. Brown, Linus J. Schumacher, and  
571 Robert Endres. 2019. “Comparison of Solitary and Collective Foraging  
572 Strategies of *Caenorhabditis Elegans* in Patchy Food Distributions.” *BioRxiv*,  
573 August, 744649. <https://doi.org/10.1101/744649>.
- 574 Ding, Siyu Serena, Linus J Schumacher, Avelino E Javier, Robert G Endres, and  
575 André EX Brown. 2019. “Shared Behavioral Mechanisms Underlie *C. Elegans*  
576 Aggregation and Swarming.” Edited by Naama Barkai, Târn Mignot, Jonathan  
577 Hodgkin, and Oleg A Igoshin. *ELife* 8 (April): e43318.  
578 <https://doi.org/10.7554/eLife.43318>.
- 579 Djalalinia, Shirin, Mostafa Qorbani, Niloofar Peykari, and Roya Kelishadi. 2015.  
580 “Health Impacts of Obesity.” *Pakistan Journal of Medical Sciences* 31 (1):  
581 239–42. <https://doi.org/10.12669/pjms.311.7033>.
- 582 Fang-Yen, Christopher, Leon Avery, and Aravinthan D. T. Samuel. 2009. “Two Size-  
583 Selective Mechanisms Specifically Trap Bacteria-Sized Food Particles in  
584 *Caenorhabditis Elegans*.” *Proceedings of the National Academy of Sciences*  
585 106 (47): 20093–96. <https://doi.org/10.1073/pnas.0904036106>.
- 586 García-González, Aurian P., Ashlyn D. Ritter, Shaleen Shrestha, Erik C. Andersen,  
587 L. Safak Yilmaz, and Albertha J.M. Walhout. 2017. “Bacterial Metabolism  
588 Affects the *C. Elegans* Response to Cancer Chemotherapeutics.” *Cell* 169 (3):  
589 431-441.e8. <https://doi.org/10.1016/j.cell.2017.03.046>.
- 590 Gomez-Amaro, Rafael L., Elizabeth R. Valentine, Maria Carretero, Sarah E.  
591 LeBoeuf, Sunitha Rangaraju, Caroline D. Broaddus, Gregory M. Solis, James  
592 R. Williamson, and Michael Petrascheck. 2015. “Measuring Food Intake and  
593 Nutrient Absorption in *Caenorhabditis Elegans*.” *Genetics* 200 (2): 443–54.  
594 <https://doi.org/10.1534/genetics.115.175851>.
- 595 Gregor, Carola, Klaus C. Gwosch, Steffen J. Sahl, and Stefan W. Hell. 2018.  
596 “Strongly Enhanced Bacterial Bioluminescence with the *llux* Operon for  
597 Single-Cell Imaging.” *Proceedings of the National Academy of Sciences* 115  
598 (5): 962–67. <https://doi.org/10.1073/pnas.1715946115>.
- 599 Harvey, Simon C. 2009. “Non-Dauer Larval Dispersal in *Caenorhabditis Elegans*.”  
600 *Journal of Experimental Zoology Part B: Molecular and Developmental*  
601 *Evolution* 312B (3): 224–30. <https://doi.org/10.1002/jez.b.21287>.
- 602 Horvitz, H. R., M. Chalfie, C. Trent, J. E. Sulston, and P. D. Evans. 1982. “Serotonin  
603 and Octopamine in the Nematode *Caenorhabditis Elegans*.” *Science (New*  
604 *York, N.Y.)* 216 (4549): 1012–14. <https://doi.org/10.1126/science.6805073>.
- 605 Kiyama, Yuya, Kohji Miyahara, and Yasumi Ohshima. 2012. “Active Uptake of  
606 Artificial Particles in the Nematode *Caenorhabditis Elegans*.” *Journal of*  
607 *Experimental Biology* 215 (7): 1178–83. <https://doi.org/10.1242/jeb.067199>.
- 608 Lanan, Michele. 2014. “Spatiotemporal Resource Distribution and Foraging  
609 Strategies of Ants (Hymenoptera: Formicidae).” *Myrmecological News /*  
610 *Osterreichische Gesellschaft Fur Entomofaunistik* 20: 53–70.
- 611 Larsen, Clark Spencer. 2003. “Animal Source Foods and Human Health during  
612 Evolution.” *The Journal of Nutrition* 133 (11): 3893S-3897S.  
613 <https://doi.org/10.1093/jn/133.11.3893S>.



- 614 Lockery, Shawn R., S. Elizabeth Hulme, William M. Roberts, Kristin J. Robinson,  
615 Anna Laromaine, Theodore H. Lindsay, George M. Whitesides, and Janis C.  
616 Weeks. 2012. "A Microfluidic Device for Whole-Animal Drug Screening Using  
617 Electrophysiological Measures in the Nematode *C. Elegans*." *Lab on a Chip*  
618 12 (12): 2211–20. <https://doi.org/10.1039/C2LC00001F>.
- 619 MacArthur, Robert H., and Eric R. Pianka. 1966. "On Optimal Use of a Patchy  
620 Environment." *The American Naturalist* 100 (916): 603–9.
- 621 Maier, Lisa, Mihaela Pruteanu, Michael Kuhn, Georg Zeller, Anja Telzerow, Exene  
622 Erin Anderson, Ana Rita Brochado, et al. 2018. "Extensive Impact of Non-  
623 Antibiotic Drugs on Human Gut Bacteria." *Nature* 555 (7698): 623–28.  
624 <https://doi.org/10.1038/nature25979>.
- 625 Mattson, Mark P., David B. Allison, Luigi Fontana, Michelle Harvie, Valter D. Longo,  
626 Willy J. Malaisse, Michael Mosley, et al. 2014. "Meal Frequency and Timing in  
627 Health and Disease." *Proceedings of the National Academy of Sciences* 111  
628 (47): 16647–53. <https://doi.org/10.1073/pnas.1413965111>.
- 629 McKay, James P., David M. Raizen, Alexander Gottschalk, William R. Schafer, and  
630 Leon Avery. 2004. "Eat-2 and Eat-18 Are Required for Nicotinic  
631 Neurotransmission in the *Caenorhabditis Elegans* Pharynx." *Genetics* 166 (1):  
632 161–69.
- 633 Milward, K., K. E. Busch, R. J. Murphy, M. de Bono, and B. Olofsson. 2011.  
634 "Neuronal and Molecular Substrates for Optimal Foraging in *Caenorhabditis*  
635 *Elegans*." *Proceedings of the National Academy of Sciences* 108 (51): 20672–  
636 77. <https://doi.org/10.1073/pnas.1106134109>.
- 637 Niacaris, Timothy, and Leon Avery. 2003. "Serotonin Regulates Repolarization of the  
638 *C. Elegans* Pharyngeal Muscle." *The Journal of Experimental Biology* 206 (0  
639 2): 223–31.
- 640 Nicholls, Samantha B., and Jeanne A. Hardy. 2013. "Structural Basis of  
641 Fluorescence Quenching in Caspase Activatable-GFP: Fluorescence  
642 Quenching in CA-GFP." *Protein Science* 22 (3): 247–57.  
643 <https://doi.org/10.1002/pro.2188>.
- 644 Raizen, D. M., R. Y. Lee, and L. Avery. 1995. "Interacting Genes Required for  
645 Pharyngeal Excitation by Motor Neuron MC in *Caenorhabditis Elegans*."  
646 *Genetics* 141 (4): 1365–82.
- 647 Rodríguez-Palero, M<sup>a</sup> Jesús, Ana López-Díaz, Roxane Marsac, José-Eduardo  
648 Gomes, María Olmedo, and Marta Artal-Sanz. 2018. "An Automated Method  
649 for the Analysis of Food Intake Behaviour in *Caenorhabditis Elegans*."  
650 *Scientific Reports* 8 (1). <https://doi.org/10.1038/s41598-018-21964-z>.
- 651 Rogers, Candida, Annelie Persson, Benny Cheung, and Mario de Bono. 2006.  
652 "Behavioral Motifs and Neural Pathways Coordinating O<sub>2</sub> Responses and  
653 Aggregation in *C. Elegans*." *Current Biology* 16 (7): 649–59.  
654 <https://doi.org/10.1016/j.cub.2006.03.023>.
- 655 Sawin, E R, R Ranganathan, and H R Horvitz. 2000. "C. *Elegans* Locomotory Rate  
656 Is Modulated by the Environment through a Dopaminergic Pathway and by  
657 Experience through a Serotonergic Pathway." *Neuron* 26 (3): 619–31.
- 658 Scholz, Monika, Dylan J. Lynch, Kyung Suk Lee, Erel Levine, and David Biron. 2016.  
659 "A Scalable Method for Automatically Measuring Pharyngeal Pumping in *C.*  
660 *Elegans*." *Journal of Neuroscience Methods* 274 (December): 172–78.  
661 <https://doi.org/10.1016/j.jneumeth.2016.07.016>.
- 662 Scott, Euan, Adam Hudson, Emily Feist, Fernando Calahorra, James Dillon, Raissa  
663 de Freitas, Matthew Wand, Liliane Schoofs, Vincent O'Connor, and Lindy

- 664 Holden-Dye. 2017. "An Oxytocin-Dependent Social Interaction between  
665 Larvae and Adult *C. Elegans*." *Scientific Reports* 7 (1).  
666 <https://doi.org/10.1038/s41598-017-09350-7>.
- 667 Scott, Timothy A., Leonor M. Quintaneiro, Povilas Norvaisas, Prudence P. Lui,  
668 Matthew P. Wilson, Kit-Yi Leung, Lucia Herrera-Dominguez, et al. 2017.  
669 "Host-Microbe Co-Metabolism Dictates Cancer Drug Efficacy in *C. Elegans*."  
670 *Cell* 169 (3): 442-456.e18. <https://doi.org/10.1016/j.cell.2017.03.040>.
- 671 Shtonda, B. B. 2006. "Dietary Choice Behavior in *Caenorhabditis Elegans*." *Journal*  
672 *of Experimental Biology* 209 (1): 89–102. <https://doi.org/10.1242/jeb.01955>.
- 673 Stenberg, Marika, and Anders Persson. 2005. "The Effects of Spatial Food  
674 Distribution and Group Size on Foraging Behaviour in a Benthic Fish."  
675 *Behavioural Processes* 70 (1): 41–50.  
676 <https://doi.org/10.1016/j.beproc.2005.04.003>.
- 677 Trepanowski, John F., Robert E. Canale, Kate E. Marshall, Mohammad M. Kabir,  
678 and Richard J. Bloomer. 2011. "Impact of Caloric and Dietary Restriction  
679 Regimens on Markers of Health and Longevity in Humans and Animals: A  
680 Summary of Available Findings." *Nutrition Journal* 10 (1): 107.  
681 <https://doi.org/10.1186/1475-2891-10-107>.
- 682 You, Young-jai, Jeongho Kim, David M. Raizen, and Leon Avery. 2008. "Insulin,  
683 CGMP, and TGF- $\beta$  Signals Regulate Food Intake and Quiescence in *C.*  
684 *Elegans*: A Model for Satiety." *Cell Metabolism* 7 (3): 249–57.  
685 <https://doi.org/10.1016/j.cmet.2008.01.005>.
- 686 Zhao, Yuehui, Lijiang Long, Wen Xu, Richard F Campbell, Edward E Large, Joshua  
687 S Greene, and Patrick T McGrath. 2018. "Changes to Social Feeding  
688 Behaviors Are Not Sufficient for Fitness Gains of the *Caenorhabditis Elegans*  
689 N2 Reference Strain." Edited by Yuichi Iino and Patricia J Wittkopp. *ELife* 7  
690 (October): e38675. <https://doi.org/10.7554/eLife.38675>.

691

692

## 693 **Acknowledgements**

694

695 ilux pGEX(-) was a gift from Stefan Hell (Addgene plasmid #107879;  
696 <http://n2t.net/addgene:107879>; RRID:Addgene\_107879). *E. coli* OP50-DsRed and  
697 OP50-GFP strains are gifts from Jonathan Hodgkin. Some worm strains were  
698 provided by the CGC, which is funded by NIH Office of Research Infrastructure  
699 Programs (P40 OD010440). We thank Alex Sardini for assisting with the IVIS  
700 Spectrum imaging system.

701

## 702 **Funding**

703

704 This work was funded by the Biotechnology and Biological Sciences Research  
705 Council through grant BB/N00065X/1 to AEXB, and by the Medical Research  
706 Council through grants MC-A658-5TY30 to AEXB and MC-A658-5QEA0 to KSS.  
707 KSS is supported by an Imperial College Research Fellowship.

708

## 709 **Author contributions**

710

711 AEXB and KSS conceived the project. SSD designed and performed the  
712 experiments and conducted data analysis. The manuscript was written by SSD and  
713 revised by all authors.
